# Supplementary material for: A zwitterionic polymer as a novel inhibitor of protein aggregation
Source: Royal Society of Chemistry journal article supplement (doi:10.1039/c5tb01021g), 2015-01-01
Supplement: c5tb01021g1.pdf [file c5tb01021g1.pdf]

Electronic Supplementary Information for

## Zwitterionic polymer as a novel inhibitor of protein aggregation

R. Rajan and K. Matsumura

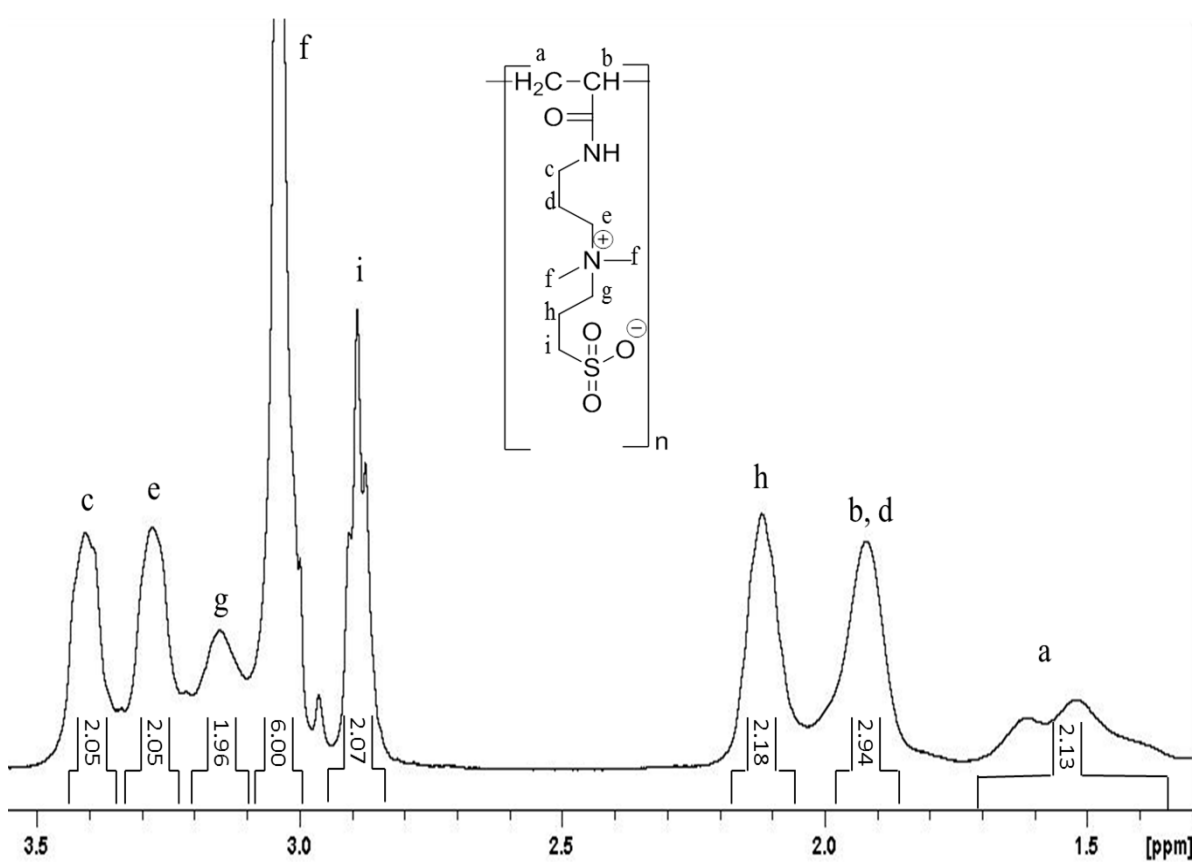

Fig. S1 <sup>1</sup>H-NMR of poly-SPB in D<sub>2</sub>O.

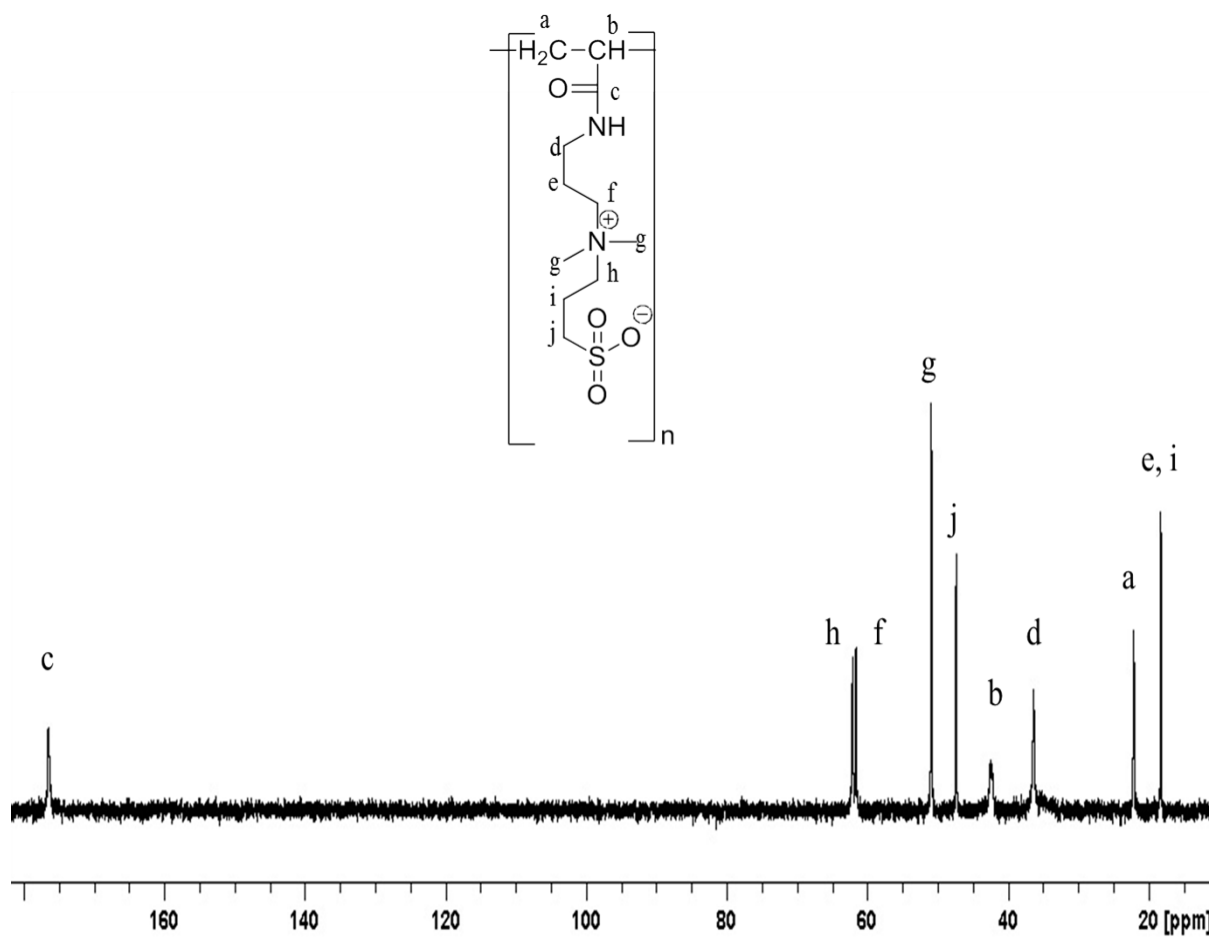

Fig. S2  $^{13}\text{C}$ -NMR of poly-SPB in  $\text{D}_2\text{O}$ .

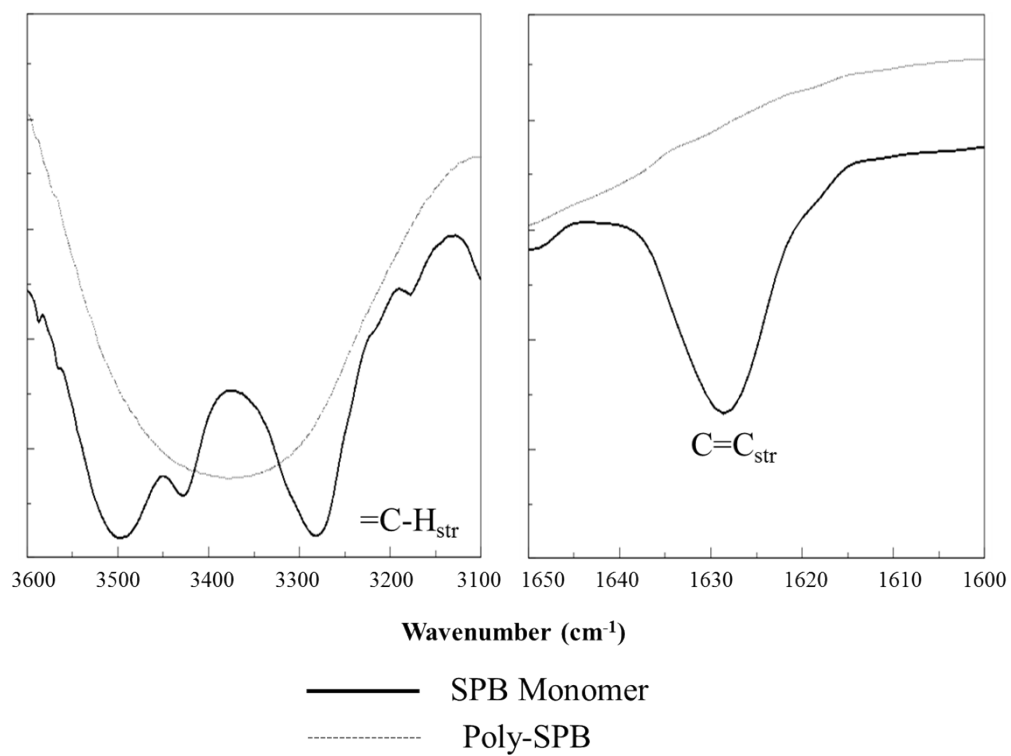

Fig. S3 ATR-FTIR spectra of SPB monomer and poly-SPB.

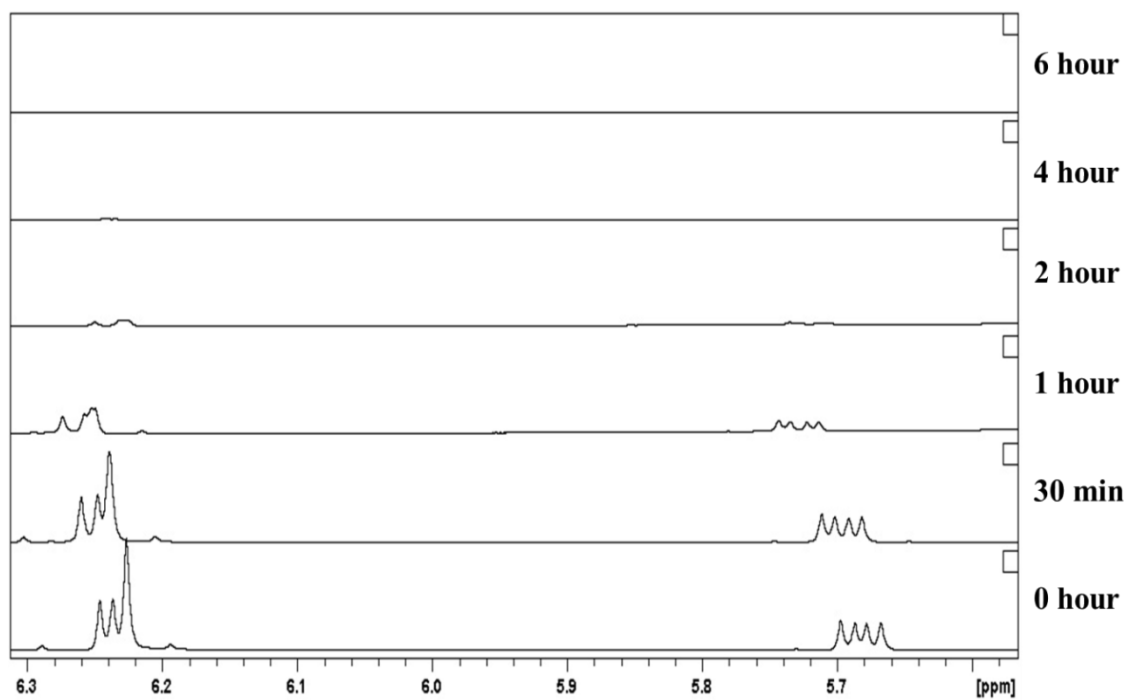

Fig. S4 Time-dependent  $^1\text{H-NMR}$  of poly-SPB.
